# Supplementary material for: FEM-based stability charts for underground cavities in soft carbonate rocks: validation through case-study applications
Source: Copernicus journal article supplement (doi:10.5194/nhess-2019-55), 2019-03-13
Supplement: Supplementary file [file nhess-2019-55-RC2-supplement.pdf]

# FEM-based stability charts for underground cavities in soft carbonate rocks: validation through case-study applications

Perrotti M.<sup>1</sup>, Lollino P.<sup>1</sup>, Fazio N.L.<sup>1</sup>, Parise M.<sup>1,2</sup>

<sup>1</sup> CNR – IRPI, Bari, 70126, Italy

<sup>2</sup> Department of Earth and Geo-environmental Sciences, University of Bari “Aldo Moro”, Bari, 70126 Italy

## Abstract

The stability of man-made underground cavities in soft rocks interacting with overlying structures and infrastructures represents a challenging problem to be faced. Based upon the results of a large number of parametric two-dimensional (2D) finite-element analyses of ideal cases of underground cavities, accounting for the variability of cave geometrical features and rock mechanical properties, specific charts have been recently proposed in the literature to assess at a preliminary stage the stability of the cavities. The purpose of the present paper is to validate the efficacy of the stability charts by means of the application to several case studies of underground cavities, either subjected to collapse in the past or still stable. The stability charts proposed result to be performing to catch the stability conditions and, eventually, the conditions that lead to failure occurrence. For sinkholes already occurred, they show the importance of structural elements as pillars and internal walls in the stability of the whole quarry system, whereas, for cavities that have not reached failure, they can provide useful indications about the eventual proneness of the underground cavity to local or general instability phenomena.

graph? map?

both?

are which collapsed already?

Complex sentence

leading to collapses

carefully because for past collapses, you can explain present or future, you can evaluate the hazard level  
predisposition, probability, propensity to

## 1. Introduction

The presence of underground cavities as a result of past mining operations of soft rocks, to be used as building material, nowadays induce high risk conditions for those regions characterised by a large number of underground quarries and mines. In Apulia region (southern Italy), soft and very soft carbonate rocks as calcarenites of Pliocene or Pleistocene age, have been largely used (Parise 2010, 2012), especially in the last century, in many types of construction, so that a diffuse net of cavities, nowadays underlying urban areas and infrastructures, was excavated in the last century and abandoned afterwards. In recent years, several collapses affected some of these cavity systems, involving structures and roads located at the ground surface and, therefore, inducing high risk for human life and properties (Fiore and Parise 2013). These effects are caused by degradation processes of these rock materials as a consequence of weathering- or human-induced actions over time (Ciantia et al. 2015); as a consequence, the stability of the quarries may change after decades from the time of excavation, giving rise to local or global cave instabilities and failures.

shorter sentences will be better

evolve

47 The problem of assessing the stability of underground cavities in soft rocks is generally faced <sup>with</sup> by  
48 means of approaches characterized by different levels of accuracy and reliability. Phenomenological  
49 and analytical approaches are generally chosen in the preliminary stage of the analysis to deduce if  
50 the rock mass is close to instability or not (Gesualdo et al. 2001; Fraldi and Guarracino 2009; Carter  
51 2014). Later on, more deterministic and accurate approaches could be adopted, such as those based  
52 on numerical modelling (Goodings and Abdulla 2002; Ferrero et al. 2010; Parise and Lollino 2011;  
53 Castellanza et al. 2018). The latter approach can be very useful nowadays, because three-  
54 dimensional studies can be carried out due to the availability of powerful numerical codes, which  
55 are capable of treating a wide range of problems related to the structural features of the rock mass  
56 examined (for both continuous or discontinuous rock masses). However, although remaining the  
57 most efficient way to dealing with stability problems at the specific site scale, sophisticated  
58 numerical techniques cannot be applied effectively to a large dataset of stability assessments  
59 because they require a large amount of detailed input data, which are not frequently available, and  
60 consequently they cannot be practically used for a preliminary evaluation. On the contrary, wide  
61 regions throughout the world are characterized by a huge number of cavities affecting the  
62 underground environment, so that representative three-dimensional numerical analyses cannot be  
63 developed efficiently for all the case studies. Therefore, in such cases, physically- or mechanically-  
64 based stability charts can be useful to provide a preliminary assessment on the stability of the  
65 underground system, as a function of the geometrical and mechanical parameters (Evangelista et  
66 al. 2003; Federico and Screpanti 2003; Suchowerska et al. 2012). It is worthwhile remarking that  
67 these approaches should be considered only as a preliminary stage of the complete procedure to  
68 be followed for the stability assessment (Castellanza et al. 2018, Fiore et al. 2018). Therefore, when  
69 a medium to high level of hazard comes out from the application of the charts here proposed, more  
70 detailed and site-specific investigations must necessarily be applied.

## 2. FEM-based underground cave stability charts

77 Perrotti and co-authors (2018) have proposed a two-dimensional finite element parametric study  
78 that account for ideal schemes of rectangular cavities, as shown in Figure 1, with variable  
79 geometrical parameters, as the cavity width (L), the cavity height (h) and the overburden thickness  
80 (t). A large set of 2D finite-element analyses were carried out using Plaxis-2D software in order to  
81 evaluate possible correlations between geometrical features of cavities and material strength  
82 parameters. The ranges of variation of these variables are consistent with the typical intervals of  
83 values observed for man-made Apulian underground quarries excavated in soft carbonate rocks,  
84 belonging to the Calcarenite di Gravina formation (Coviello et al. 2005; Andriani and Walsh 2010;  
85 Ciantia et al. 2015). In particular, the width of cavity, L, is assumed to vary in a range from 1 to 30  
86 meters, the height of cavity, h, in a range from 2 to 8 meters, and the overburden thickness, t, in a  
87 range from 2 to 10 meters. Additional 3D-FEM analyses were also performed to evaluate the  
88 effect of the rock confinement in the third direction, which, generally, results in increasing the  
89 stability of underground quarries with respect to the 2D analyses.

keep the same syntax

what is the response of the authors?  
I don't understand the authors' statement

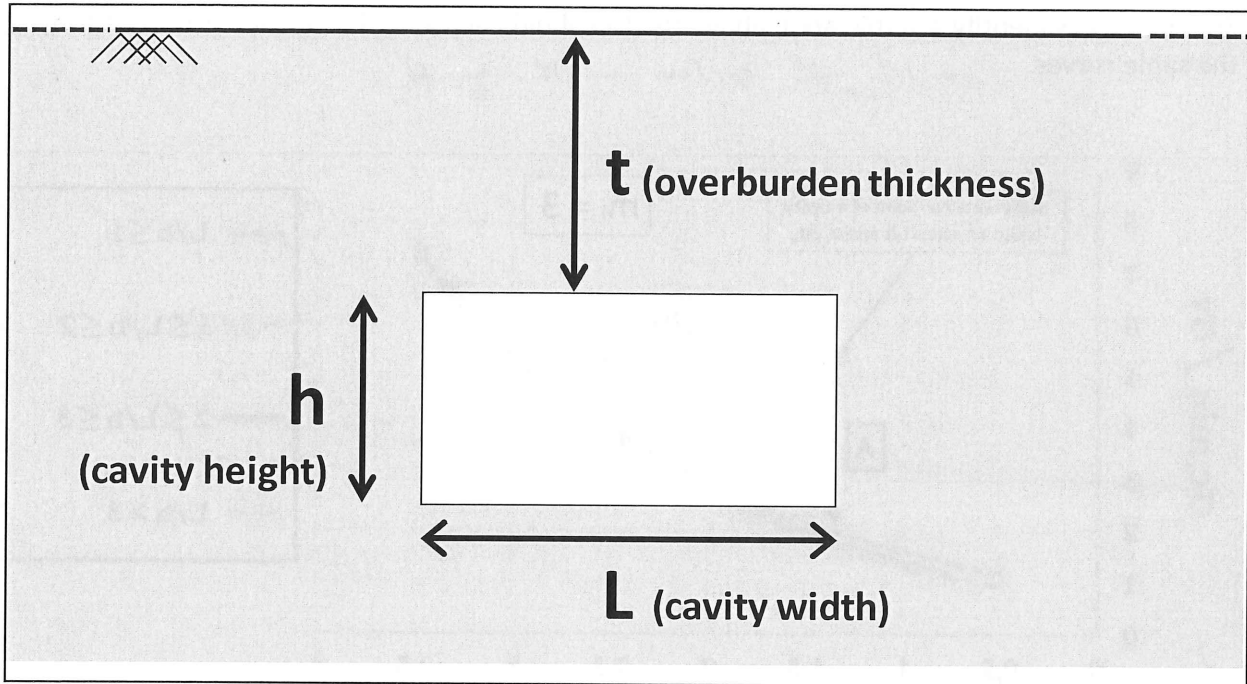

Figure 1. Geometrical parameters of the cavity ( $h$  = cavity height;  $L$  = cavity width;  $t$  = overburden thickness).

The mechanical behaviour of the soft and very soft carbonate rocks has been schematised according to an elastic perfectly plastic constitutive model characterized by a Hoek-Brown failure criterion (Hoek and Brown, 1997; Hoek and Martin, 2014), which is capable to simulate a nonlinear strength envelope in the Mohr's plane, as generally observed for calcarenite rocks; the main mechanical variable chosen in the parametric analyses was the threshold value of uniaxial compressive strength  $\sigma_{c,min}$ , which corresponds to the activation of a failure mechanism for the cavity. Based upon field survey observations, which indicated that these rocks are rarely jointed, the rock mass was assumed to be intact and not affected by discontinuities, and consequently a geological strength index GSI (Hoek 1994) value equal to 100 was used in the analyses. It follows that the results obtained from the analyses cannot be considered valid for those cases where the rock mass is characterized by single joints or joint sets, so that the rock mass behaviour has a certain degree of anisotropy that cannot be disregarded. The parameter  $D$ , representative of the disturbance factor induced by the excavation technique, was prescribed equal to zero to simulate a rock mass that has not been disturbed or affected by stress release processes due to the specific hand-excavation technique adopted throughout the whole region (generally, this was the hand-excavation technique with chisels and hammers, adopted in order to obtain large blocks of calcarenites to be used as building material). The parameter  $m_i$  was defined, in first approximation, in accordance with the suggestions proposed by Cai (2010), to represent the ratio between the uniaxial compressive and tensile strength of the rock: three different values, equal to 3, 8 and 16 have been chosen in accordance with the values proposed by Hoek (2007) for the specific rock type, as well as with the results of uniaxial compressive and tensile strength tests performed on samples belonging to different varieties of the Gravina Calcarenite Formation (Andriani and Walsh, 2010).

The resulting plots showing the  $\sigma_{c,min}/\sigma_v$  ratio (i.e. threshold value of uniaxial compressive strength mobilized at failure divided by vertical stress before excavation, acting at the depth of the cavity roof) as a function of the non-dimensional ratio  $L/t$ , keeping fixed the non-dimensional cavity shape ratio  $L/h$ , are shown in Figures 2, 3 and 4, as referred to values of  $m_i$  equal, respectively, to 3, 8 and

other values?  
of  $D$

parameters and the assumption

122 16. The curves identify a stable area, above the threshold curves, and an unstable area underlying  
 123 the same curves. *identify the sectors on the graph.*  
 124  
 125

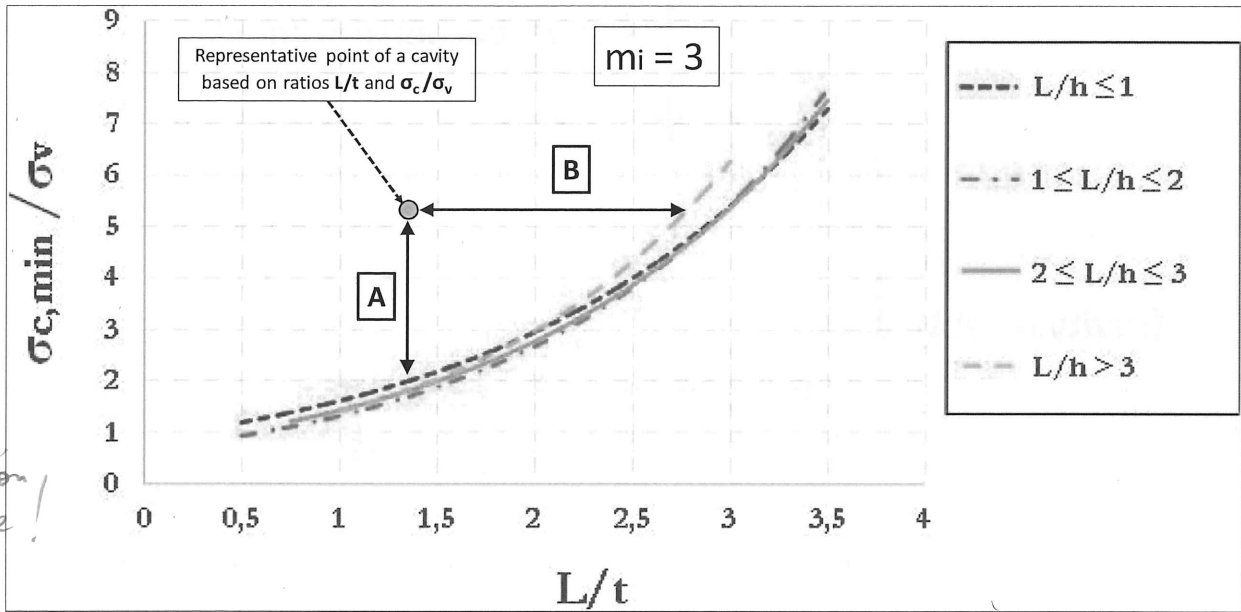

126  
 127 Figure 2. Curves of  $\sigma_{c,min}/\sigma_v$  against  $L/t$  for different values of the ratio  $L/h$  ( $m_i = 3$ ) (modified after  
 128 Perrotti et al. 2018).  
 129  
 130

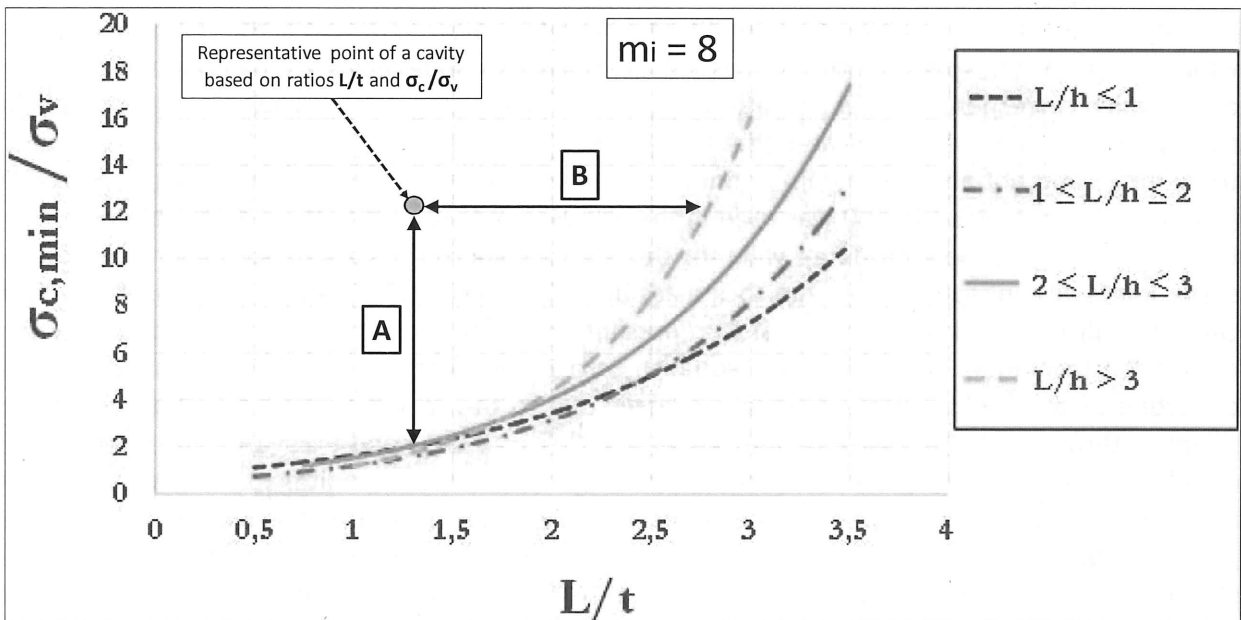

131  
 132 Figure 3. Curves of  $\sigma_{c,min}/\sigma_v$  against  $L/t$  for different values of the ratio  $L/h$  ( $m_i = 8$ ) (modified after  
 133 Perrotti et al. 2018).  
 134  
 135

*And a 3<sup>rd</sup> Zone = on the line!*



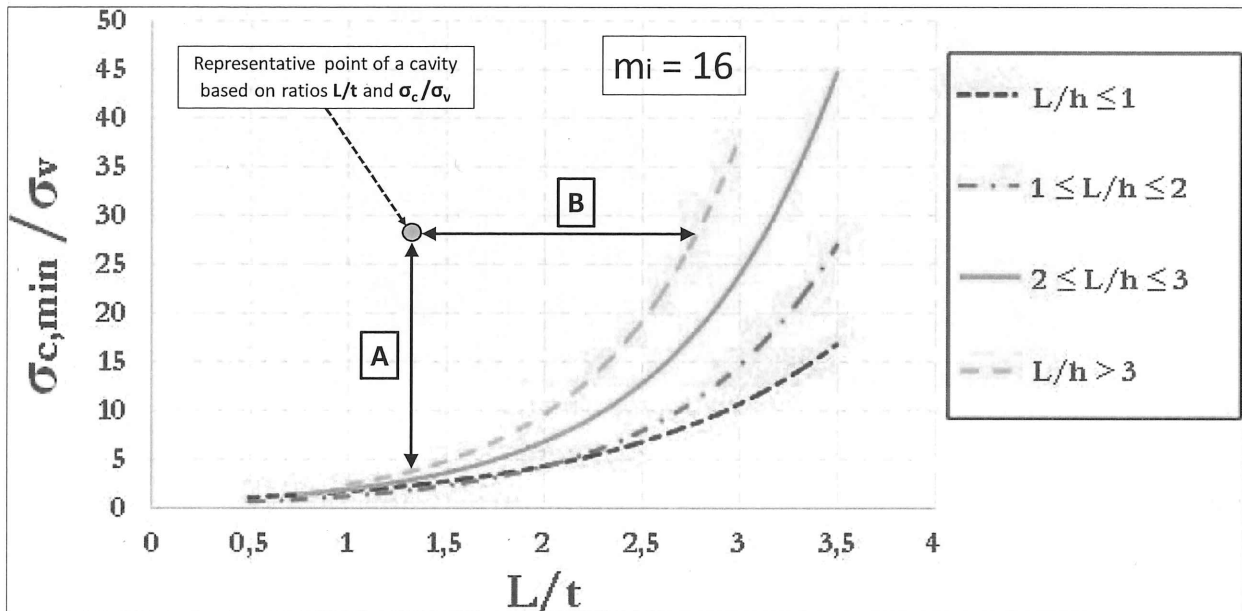

Figure 4. Curves of  $\sigma_{c,min}/\sigma_v$  against  $L/t$  for different values of the ratio  $L/h$  ( $m_i = 16$ ) (modified after Perrotti et al. 2018).

These stability charts can be used to calculate the safety margin with respect to failure (segment A in Figure 2, 3 and 4) as the ratio between the actual in situ value of the rock uniaxial compressive strength ( $\sigma_c$ ) and the threshold value for stability of the same parameter ( $\sigma_{c,min}$ ) at the same  $L/t$  value. Alternatively, the same plots allow to calculate the maximum value of the width-to-depth ratio ( $L/t$ ) allowed for stability (segment B), given the assigned value of the ratio between the in situ uniaxial compressive strength ( $\sigma_c$ ) and the vertical stress ( $\sigma_v$ ).

The following section describes some case studies of man-made underground cavities in soft calcarenites, either subjected to failure or stable, and the corresponding application of the FEM-based charts to evaluate the corresponding unstable or stable conditions as a function of the mechanical and geometrical parameters.

a bit hard to understand without equation

Remark: gather Fig 2, 3, 4 in only one Fig. and produce a second one to explain the meaning of A and B segments

2. What is the benefit(s) of a 3D FEM model? And how much?

3. Application to case studies

3.1. Barletta sinkhole

How nice to explain how these cases have been selected to apply the graphs; (already collapsed or not, mapped or unknown...)

3. How is the safety margin (or parameter) quantified? Which values?

In the night between 2 and 3 May of 2010, a large sinkhole occurred in the rural area of "San Procopio" (De Giovanni et al. 2011; Parise et al. 2013), near the town of Barletta (Apulia, southern Italy); the maximum diameter of the depression has been calculated to be approximately equal to 32 m at the ground surface (Figure 5).

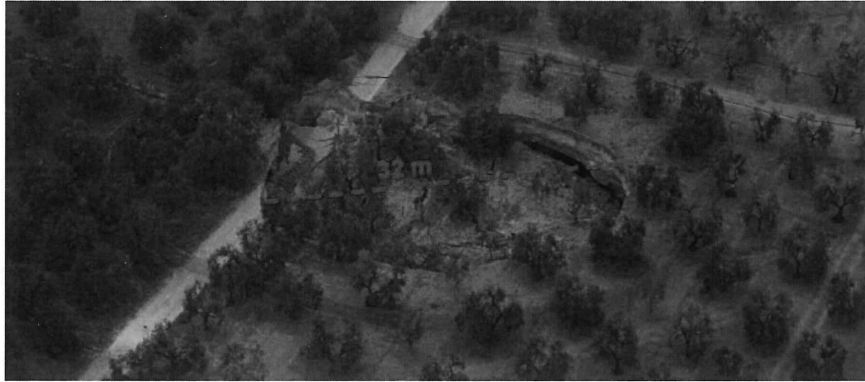

165  
166

Figure 5. Aerial view of the sinkhole occurred in the Barletta area.

Source? is it useful?  
a vertical geological with thickness and depth of each layers should be more useful.

167  
168  
169  
170  
171  
172  
173  
174  
175  
176

Later on, geological and speleological surveys have revealed the existence of a complex network of artificial tunnels excavated presumably between the 19<sup>th</sup> and the 20<sup>th</sup> century in order to extract calcarenite rocks as a building material (De Giovanni et al. 2011; Parise et al. 2013). These studies have revealed that the underground cavity was formed of wide and long tunnels with a large number of isolated pillars showing an irregular spatial distribution, as reported in Figure 6. In the sinkhole area (N-W sector of the cavity), the spatial distribution of pillars was coarsen, as compared with the rest of the cavity system, and characterised by the presence of only 8 pillars located at a distance of about 10 ± 12 meters from the others; as such, these pillars were deemed to be heavily overloaded and probably subjected to high stress conditions.

variable?  
or lighter?

177  
178

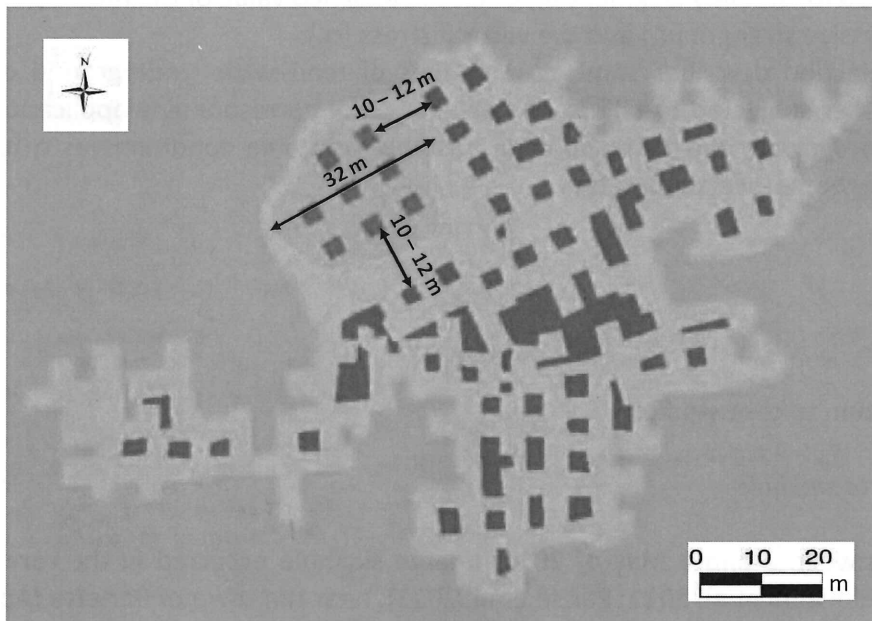

179  
180  
181  
182  
183

Figure 6. Schematic map of the Barletta underground calcarenite quarry (adapted after Luisi et al. 2015); the area involved in the collapse is shown in orange, pillars are in dark grey, and tunnels and excavated zones are in light grey.

Source?

184 Instability evidences, as signs of pillar crushing or fractures with detachments from the vault and  
185 the walls (figure 7), were found throughout the cavity, especially close to the sinkhole area (De  
186 Giovanni et al. 2011).

187

How are  
used the  
instability  
evidence?

Why do  
you  
show this?

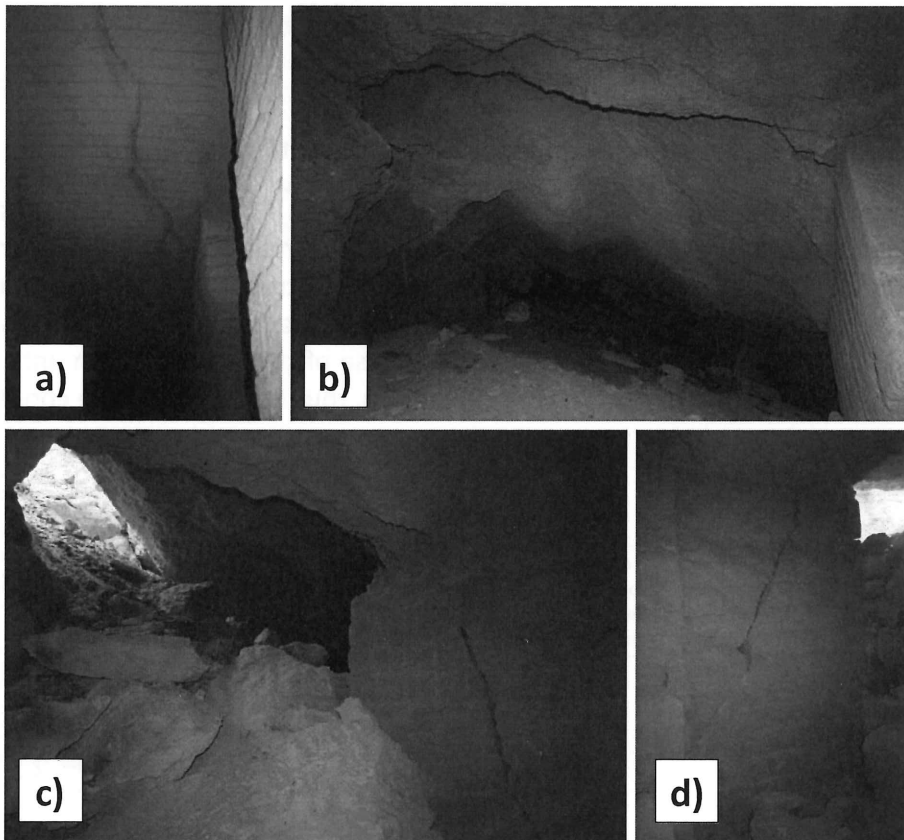

188

189 Figure 7. Instability evidences at the Barletta underground quarry: a) tensile fracturing of the vault;  
190 b) material detachment from the vault; c) open fracture on pillar, and vault collapses in the area  
191 closest to the sinkhole rims; d) crushing of pillar with joints. *Source?*

192

193 In order to verify the stability conditions using the charts proposed by Perrotti and co-authors  
194 (2018), an initial value of the cavity width of about  $10 \div 12$  meters, corresponding to the largest  
195 distance between two adjacent pillars (see Figure 6), has been assumed, bearing in mind that the  
196 failure of the nearby pillars has presumably implied an increase of the effective L parameter.  
197 Speleological surveys have indicated an average thickness of the calcarenite deposits in the study  
198 area of about 6 m, with minimum value of 4 m (De Giovanni et al., 2011), with an upper layer of  
199 about  $0.5 \div 0.8$  m composed of sandy-silty topsoil (unit weight  $\gamma = 20 \text{ kN/m}^3$ ) overlying a  $5.2 \div 5.5$   
200 m thick calcarenite layer (unit weight  $\gamma = 17 \text{ kN/m}^3$ ). In the sinkhole area, the height of the cavity  
201 rooms has been generally measured to be about 5 m.

202

203 Uniaxial compression tests performed in the laboratory on calcarenite samples taken in the sinkhole  
204 area have indicated values of uniaxial compressive strength of about  $1 \div 2 \text{ MPa}$  under dry conditions  
205 and about  $0,75 \div 1 \text{ MPa}$  under saturated conditions (Luisi et al. 2015); tensile strength values derived  
206 from indirect tension tests have instead resulted to be approximately equal to  $0.1 \div 0.2 \text{ MPa}$ .

Remark:  
For this  
case and:  
the next  
ones,  
please use  
a standard  
table with  
all the param-  
eters and  
the values.  
Of course, keep  
the explanation  
related to the  
origin of these  
values (lab,  
tests, ...)

207 Consequently, the parameter  $m_i$  to be used in the Hoek & Brown failure criterion results in a range  
208 between  $6 \leq m_i \leq 11$ . and?

209 Hence, based on these evaluations, the non-dimensional ratios  $L/t$  and  $L/h$  can be estimated in the  
210 following ranges:  $1.66 < L/t < 2$  and  $2 < L/h < 2.4$ .

211 The vertical stress at a depth of  $h=6\text{m}$  is estimated to be equal to:

212  $\sigma_v \approx (\gamma_{\text{calc}} \cdot t_{\text{calc}}) + (\gamma_{\text{topsoil}} \cdot t_{\text{topsoil}}) = 104.4 \text{ kPa}$  *keep the same syntax.*  
*need to be defined before with a graph.*

213 and, assuming  $\sigma_c = 1 \text{ MPa}$ , a ratio  $\sigma_c/\sigma_v$  equal to about 9.6 is obtained.

214 Therefore, considering the chart corresponding to a value  $m_i = 8$  (Figure 3), and specifically the curve  
215 corresponding to  $L/h$  ratio between 2 and 3, in the initial conditions (unfailed pillars) the cavity  
216 results to be in the stability zone (Figure 8); however, if a strength loss of the nearby pillars is  
217 accounted for, an increase of the  $L$  representative parameter leads to a gradual increase of the ratio  
218  $L/t$  (as well as of  $L/h$  ratio), with the consequent decrease of the safety margin until reaching the  
219 threshold curve corresponding to the  $L/h$  value (Figure 8), thus indicating failure conditions.  
*Why? How do you evaluate  $m_i$ ?*

220 *useful?*  
221

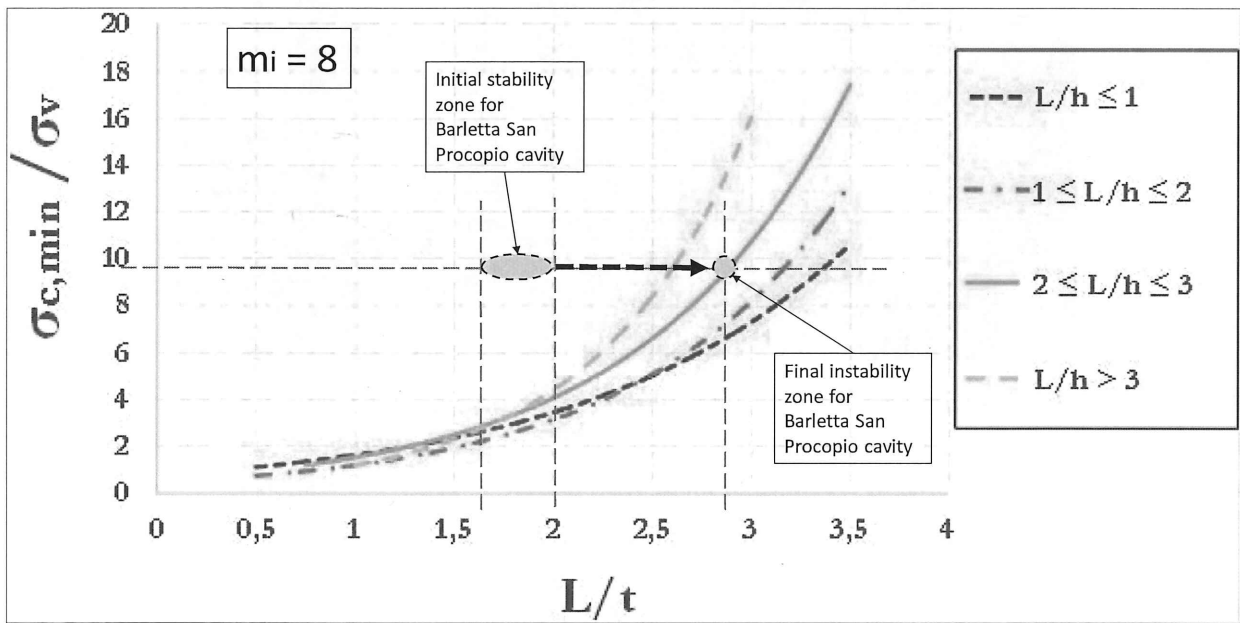

222  
223 Figure 8. Application of stability chart ( $m_i=8$ ) for the Barletta case study.  
224  
225

226 Figure 8 also shows that the cavity is close to failure conditions, already for values of ratio  $L/t$  larger  
227 than 2.5; therefore, even with the loss of the strength provided by a single pillar, a ratio  $L/t$   
228 corresponding to the achievement of the threshold stability conditions follows.

229 *is it concordant with the real case? is it the same dimensions of*  
230 *room and pillars?*  
231

### 232 3.2. Marsala sinkhole

233  
234 A sinkhole took place in the town of Marsala (Sicily, Italy) in June 2011 in the area where  
235 underground quarries were excavated according to the room-and-pillar technique at depths ranging

236 from 3 ÷ 4 meters to about 15 m; after the quarry abandonment, since the 1960's, the cavity has  
237 been progressively subjected to instability phenomena, represented by deformations and block  
238 detachments from the vaults and the pillars.

239 A detailed map of the underground cavity luckily existed before the collapse, thanks to speleological  
240 survey carried out in 2000 (Vattano et al. 2013). This allowed to properly map the sinkhole boundary  
241 above the underground quarry; with a minimum diameter of about 25 ÷ 30 m at the ground level,  
242 the sinkhole is shown in Figure 9. The figure shows that the examined quarry consists of rooms with  
243 quadrangular shape, in most cases connected and/or separated by thin rock walls or pillars. As  
244 specifically concerns the sinkhole area, the excavation was carried out according to an irregular  
245 scheme, leaving very small pillars and slight internal walls; larger sizes of the internal supporting  
246 elements, as well as lower room spans, are instead observed in the rest of the cavity system. The  
247 average room height has been estimated to be equal to 2.7 m, with the roof thickness varying from  
248 8.2 to 11.8 m.

249  
250 Try to keep a similar way to present all the study cases!

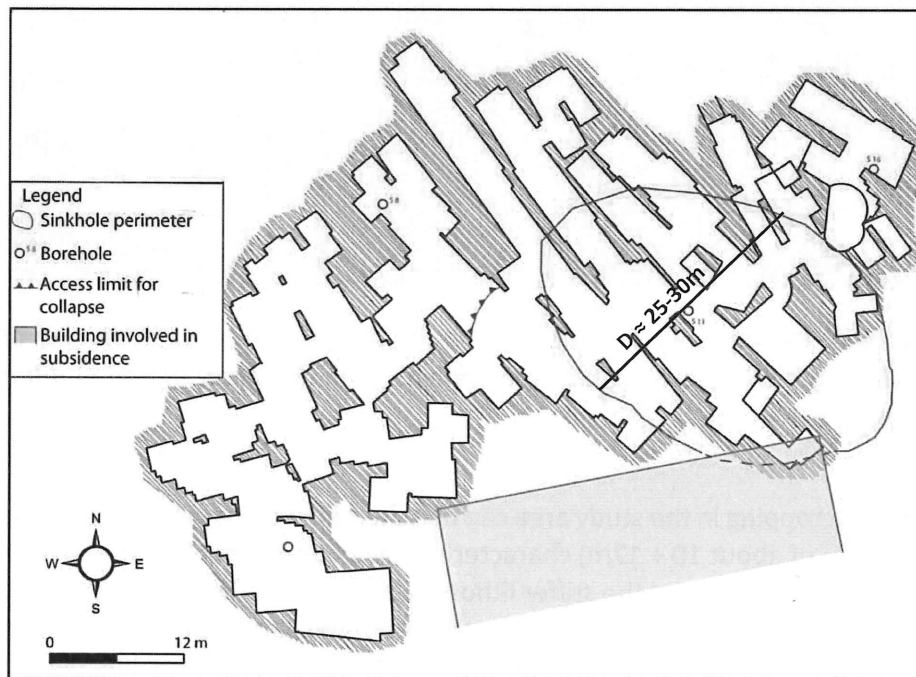

251  
252 Figure 9. Plan of the Marsala underground quarry, with indication of the sinkhole area (adapted  
253 after Vattano et al. 2013).

254  
255 For this study, Fazio et al. (2017) have proposed a three-dimensional Finite Element back-analysis  
256 and have found that the weakness of these overstressed internal structural elements could have  
257 been the reason for initial local failure, and then for global failure. In particular, the collapse of the  
258 pillars and the internal walls could have progressively entailed an increase in the width of the open  
259 galleries, leading to a total length, L, approximately equal to that of the sinkhole ( $D \approx 25 \div 30\text{m}$ ,  
260 Figure 9). Local failures of pillars and thin walls, as well as detachments and fracturing processes of  
261 the vault, are widely diffuse within the Marsala cavity, as documented in Figure 10.



See  
p 7

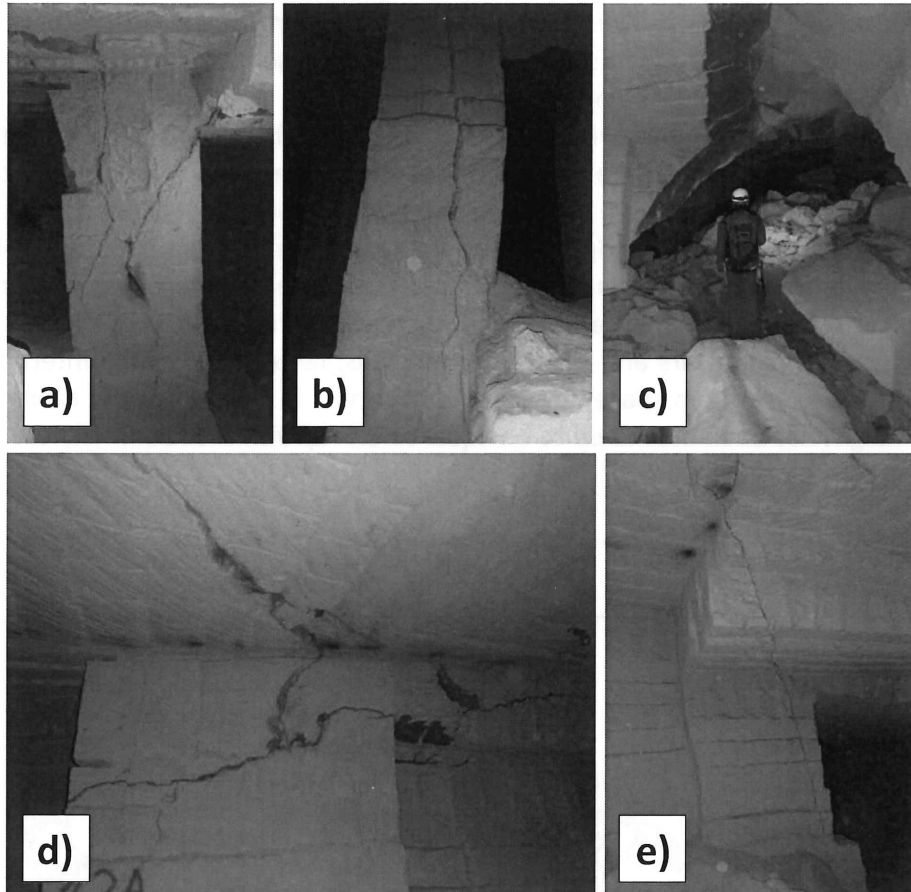

263

264 *Figure 10. Instability evidences at the Marsala underground quarry: a) fracturing of a pillar; b)*  
265 *bending and failure of a pillar; c) material detachments from the vault; d) and e) diffuse fracturing*  
266 *within the walls and the vaults.*

267

268 The calcarenites outcropping in the study area can be schematised according to two lithotypes, with  
269 a top layer (thickness of about 10 ÷ 12m) characterised by poor mechanical properties, and a stiffer  
270 deeper layer (Fazio et al. 2017). For the stiffer lithotype the dry unit weight is measured in the range  
271 between 12 and 15 kN/m<sup>3</sup>, whereas the same parameter under saturated condition is between 13.5  
272 and 17 kN/m<sup>3</sup>. Uniaxial compressive strength under saturated conditions has been measured to  
273 reach about  $\sigma_c = 1.3 \div 1.6$  MPa, whereas, with a saturation degree equal to zero,  $\sigma_c = 2 \div 3$  MPa. The  
274 value of the tensile strength can be assumed to be 1/8 ÷ 1/10 of the compressive strength, in  
275 accordance with experimental works on similar calcarenite rocks (Andriani and Walsh 2010; Ciantia  
276 et al. 2015b), so that the  $m_i$  parameter to be used in the Hoek & Brown strength criterion results to  
277 be in a range between 8 e 10.

278 Based on the aforementioned parameters, considering a cavity width  $L \approx 25 \div 30$  m (corresponding  
279 to the collapse of internal pillars and walls in Figure 9), an average height  $h$  of 2.7 m and an average  
280 overburden thickness,  $t$ , of 10 m, the corresponding non-dimensional ratios  $L/t$  and  $L/h$  result to be  
281 in the following ranges:  $2.5 < L/t < 3$  and  $9.2 < L/h < 11.1$ .

282 If a unit weight value  $\gamma_{calc}$  of 16 kN/m<sup>3</sup> is assumed, the vertical stress at depth of  $h = 10$  m is equal  
283 to:  $\sigma_v \approx (\gamma_{calc} \cdot t_{calc}) = 160$  kPa. Finally, assuming  $\sigma_c = 2$  MPa (corresponding to an intermediate value  
284 between saturated and dry conditions), a ratio  $\sigma_c/\sigma_v$  approximately equal to 12.5 is obtained.

285 Figure 11 shows the representative state of the Marsala cavity stability in the stability chart  
 286 corresponding to  $m_i = 8$ . The figure indicates that the state is located on the curve characterized by  
 287  $L/h > 3$  and this confirms the unstable condition of the underground quarry.

288

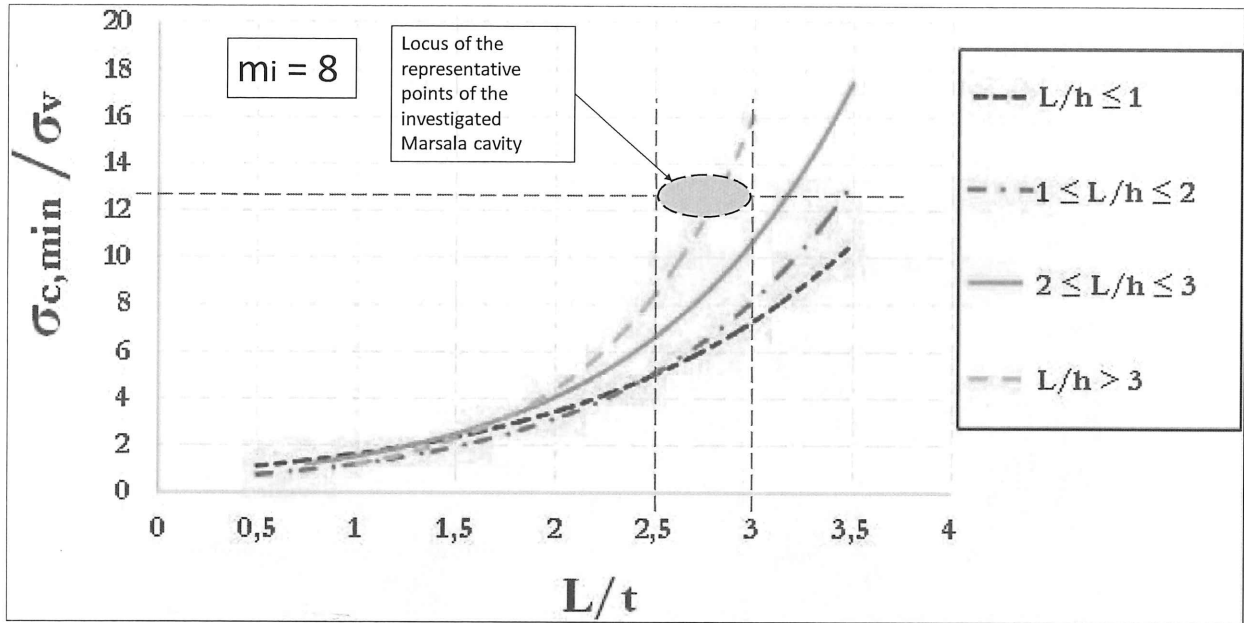

289

290 Figure 11. Application of stability chart ( $m_i = 8$ ) for the Marsala underground quarry.

291

292

### 293 3.3. Gallipoli sinkhole

294

295 In the eastern urban area of the town of Gallipoli (southern Apulia) a large sinkhole occurred in  
 296 2007, between 29th March and 1st April, with the opening of a sub elliptical 12 m x 18 m chasm  
 297 (Figure 12a), followed by a significant widening of the subsidence area at the ground level (Figure  
 298 12b) which affected some buildings located nearby.

299

300

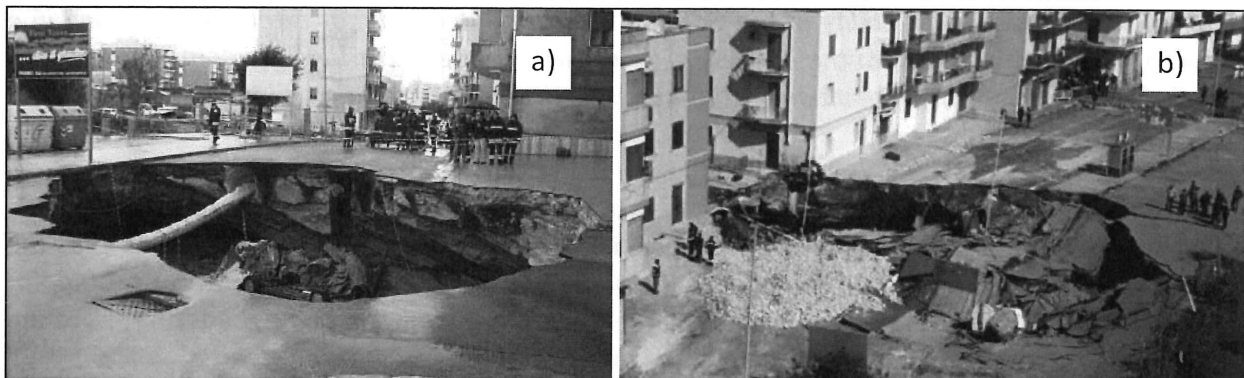

301

302 Figure 12. Pictures of the 2007 Gallipoli sinkhole: a) the first sinkhole as appeared in 29th March; b)  
 303 enlargement of the chasm on 1st April. Source ?

304

305

306 Geological surveys performed soon after the collapse detected the existence of a complex  
 307 underground cavity net, on a single level; although a room-and-pillar excavation technique was  
 308 adopted, the resulting geometry of the cavity system is highly irregular, with rooms located at  
 309 variable depth from the ground level: in particular, in the area where sinkhole occurred, the depth  
 310 of the cave bottom is of about 8 m, with a roof thickness of less than 3 ÷ 4 meters. Moreover, diffuse  
 311 signs of local instability, as block detachments from the vault and the lateral walls, debris heaps on  
 312 the floor and fractures of pillars due to crushing were found within the cavity rooms (Delle Rose  
 313 2007; Parise 2012). Some of these local instabilities are shown in Figure 13.

314  
 315

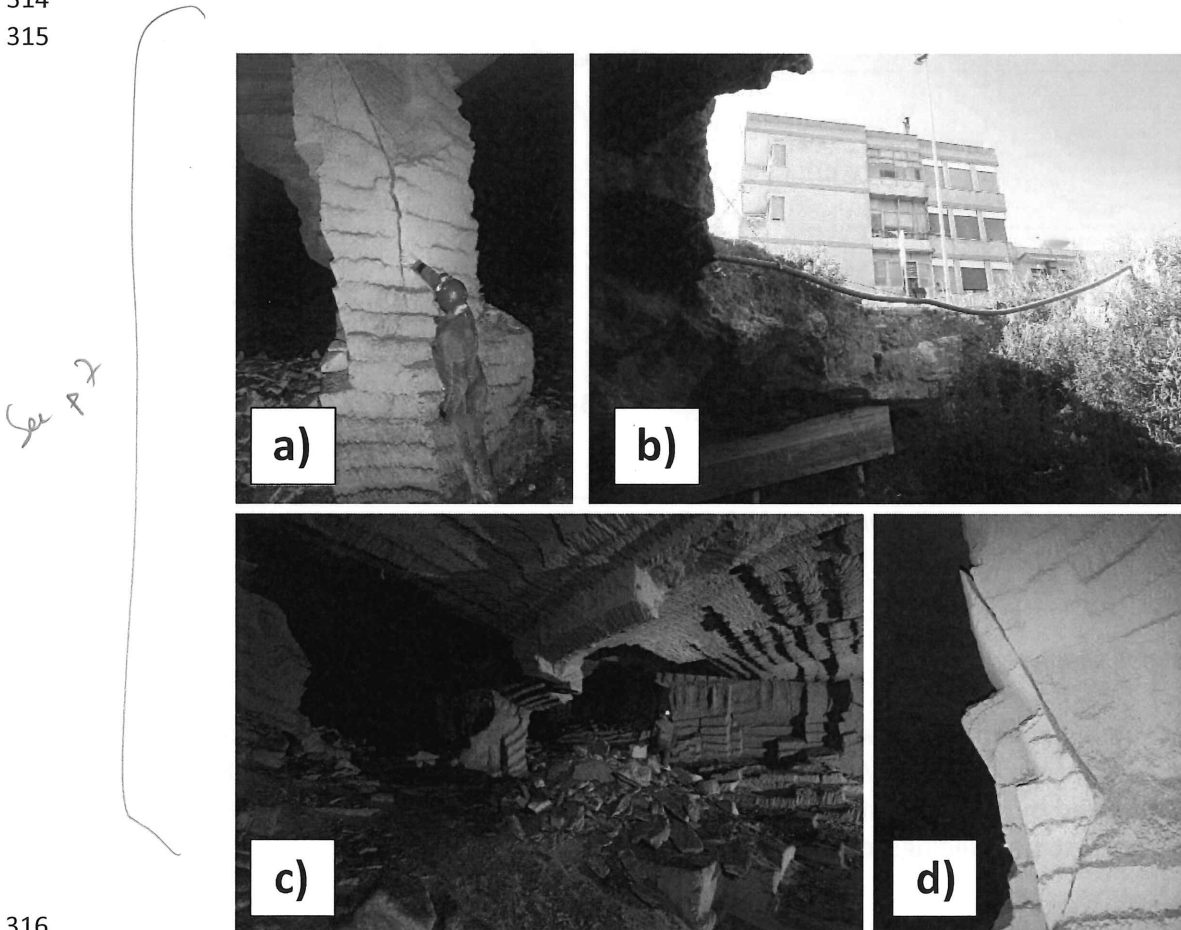

316  
 317 *Figure 13. Evidences of instability at the Gallipoli underground quarry: a) extensive fracturing in a*  
 318 *pillar; b) view of sinkhole from the bottom; c) inner view of one of the longest rooms in the cavity*  
 319 *(block detachments from the vault and debris heaps on the floor); d) incipient block detachment from*  
 320 *a pillar. Nonce?*

321  
 322 Based on the investigations performed, a reconstruction of the cavity geometry, before the collapse,  
 323 has been carried out. Figure 14 shows the position of the remaining pillars, the zones with the  
 324 accumulation of debris or detachments of blocks and the detailed perimeter of the sinkhole, for  
 325 both the first collapse and the subsequent enlargement. The buildings and the roads on the ground  
 326 surface overlying the area are also shown in the map.

327  
 328

Why a so big picture? Please focus on the area of interest!

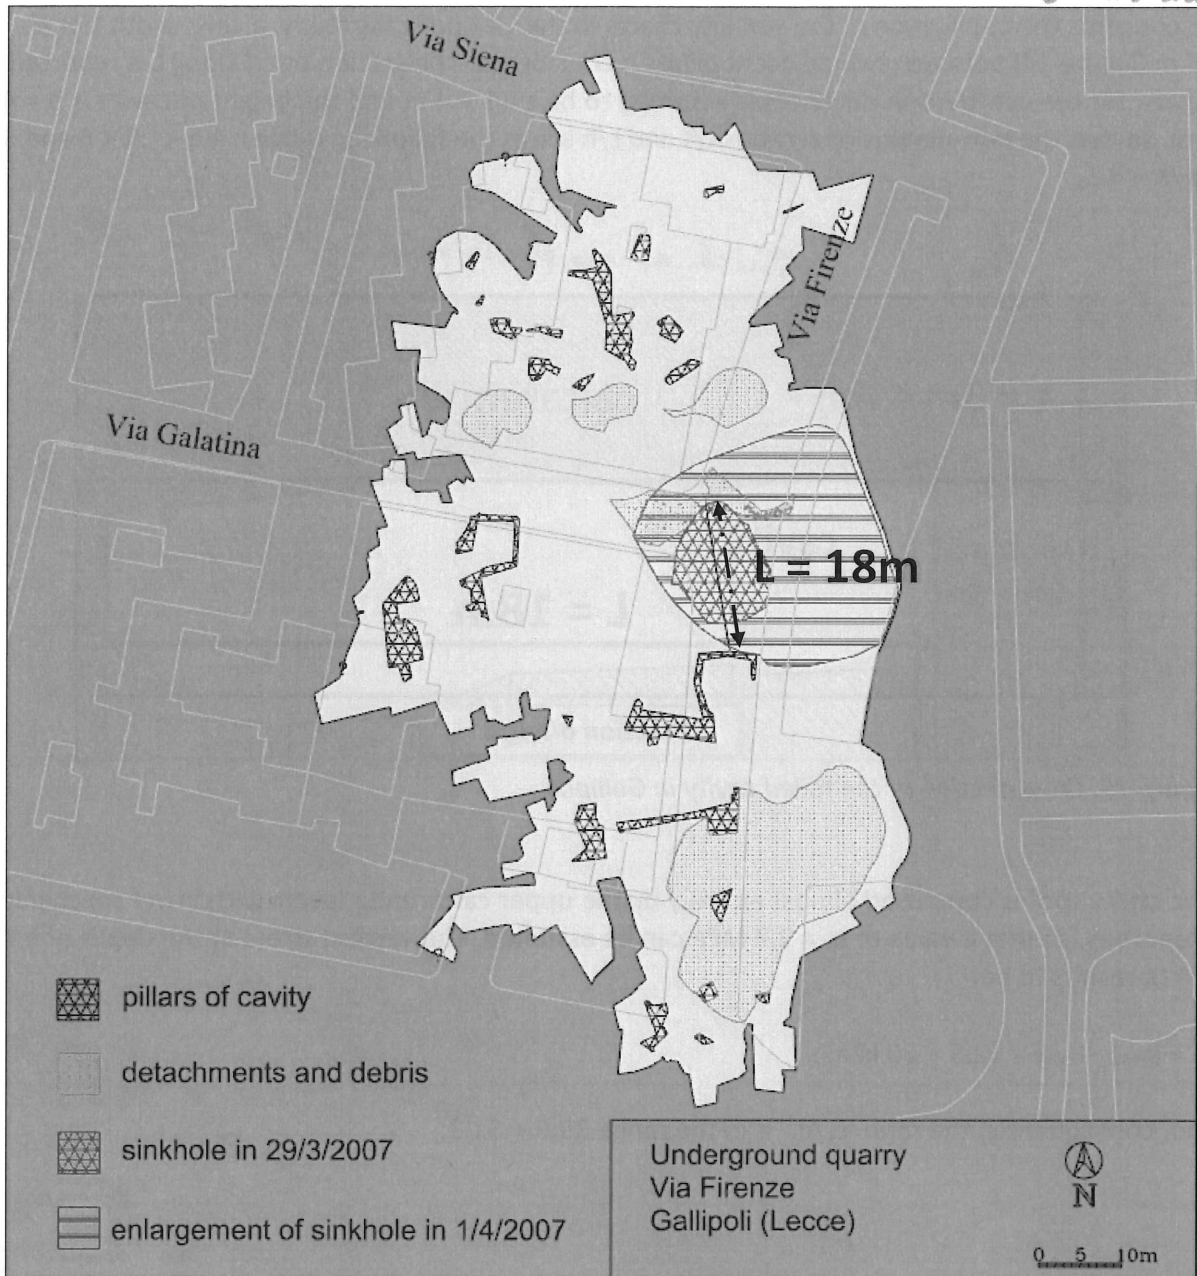

329  
330 Figure 14. Map of the underground quarry in Via Firenze, Gallipoli, and overlying built environment.

331 source?

332  
333 In the sinkhole area, deposits of the Salento Calcarenes, consisting of alternations of calcarenite  
334 rocks and looser sediments, crop out; the rock volumes affected by the mining activity (i.e., the  
335 calcarenite) appear to be massive, whereas the upper layer, forming the cavity roof, is formed of  
336 laminated and stratified calcarenite deposits with very low mechanical properties (Delle Rose 2007;  
337 Parise 2012). Based on the saturation degree, uniaxial compressive strength  $\sigma_c$  results in a range  
338 between 2.5 and 3 MPa for dry samples and 1.7 ÷ 2.3 MPa for saturated rock (Ciantia et al. 2015).  
339 Tensile strength is variable between 0.7 and 1 MPa, so that a parameter  $m_i = 3 \div 4$  of the Hoek &  
340 Brown failure criterion has been derived accordingly. A unit weight about equal to 17.5 kN/m<sup>3</sup> has  
341 been also assumed.

342 in both dry and saturated states?

343 As concerns the application of the stability charts to the Gallipoli case study, a cave width  $L$  of about  
 344 18 m (Figure 14) between two adjacent pillars is considered. The section trace along  $L$  is reported in  
 345 Figure 15; the overburden thickness is assumed to be  $t = 3 \div 4$  m and the height of cavity is  $h = 4 \div$   
 346 5 m, so that the non-dimensional ratios  $L/t$  and  $L/h$  are in the following ranges:  $4.5 < L/t < 6$  and  $3.6$   
 347  $< L/h < 4.5$ .

348  
 349

*Perfect! Such a graph is missing for the other cases.*

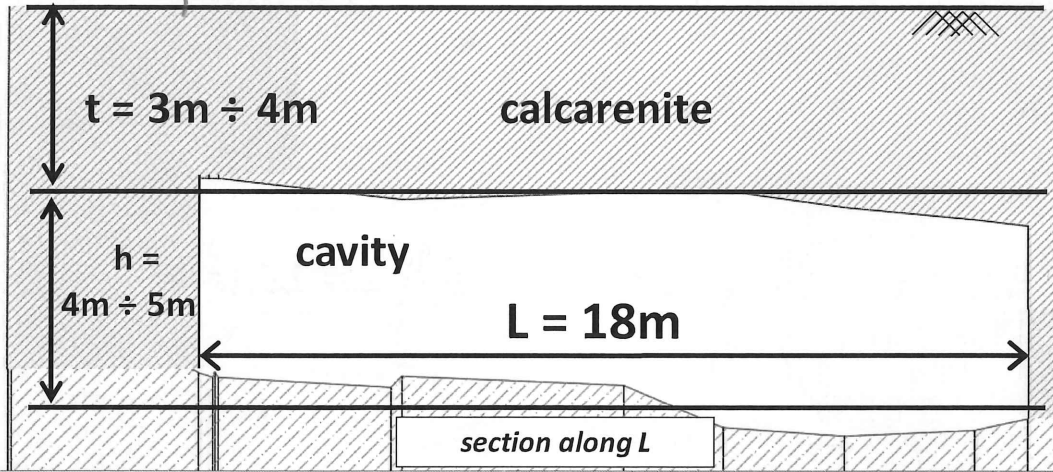

350

351 Figure 15. Cross-section of the failed cavity in Gallipoli.

352  
 353

354 The cavity roof is composed almost entirely by the upper calcarenite layers with lower mechanical  
 355 properties, so that a value of  $\sigma_c = 2.7$  MPa can be assumed. The vertical stress at the depth of  $h = 3$   
 356  $\div 4$  m results to be:

357

358  $\sigma_v \approx (\gamma_{\text{calc}} \cdot t_{\text{calc}}) = 52.5 \div 70$  kPa;

359

360 and, consequently, the ratio  $\sigma_c/\sigma_v$  is in the range  $38.6 \div 51.3$ .

361

*use a tab with both min/max value to keep the implication of the  $\sigma_v$  range on the  $\frac{\sigma_c}{\sigma_v}$  ratio variation*



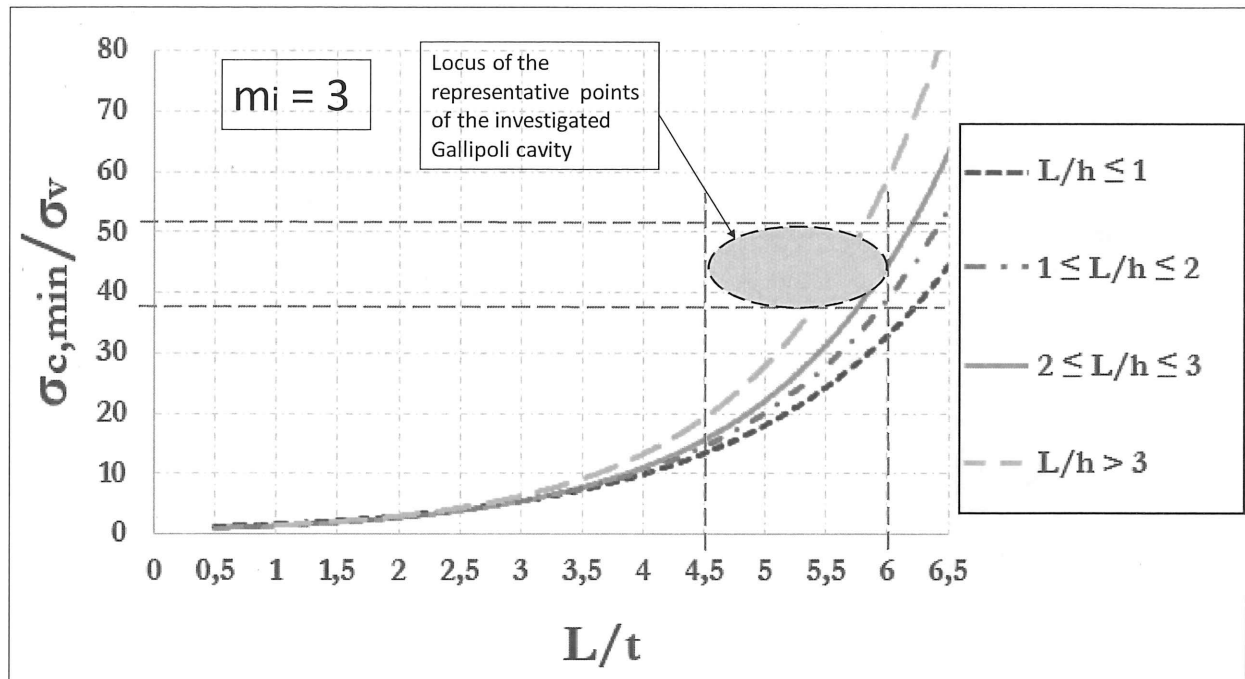

362  
363 Figure 16. Application of stability chart ( $m_i = 3$ ) for the Gallipoli underground quarry.  
364

365  
366  
367 Taking into account the stability charts corresponding to  $m_i = 3$  and, specifically, the threshold curve  
368 for  $L/h > 3$ , the representative area of the investigated cavity is very close to the threshold curve  
369 (Figure 16); therefore, it comes out that the cavity was in a state of incipient failure, so that some  
370 external factor, as for example vibrations or concentrated seepages, could have triggered the  
371 instability.

↳ pipes or sewer leakages?

372  
373  
374 **3.4. Cutrofiano underground caves**  
375

376 In the last century several underground quarries were excavated at the outskirts of the town of  
377 Cutrofiano (southern Apulia) with the room-and-pillar technique. Later on, these quarries were  
378 abandoned, and the urban area expanded above the areas originally interested by their  
379 development. Geological surveys have highlighted, in the southern part of the town, the existence  
380 of a diffuse net of underground cavities. The location of three quarries, respectively named as cave  
381 A, cave B and cave C, with respect to the overlying built-up environment, is reported in Figure 17.  
382  
383

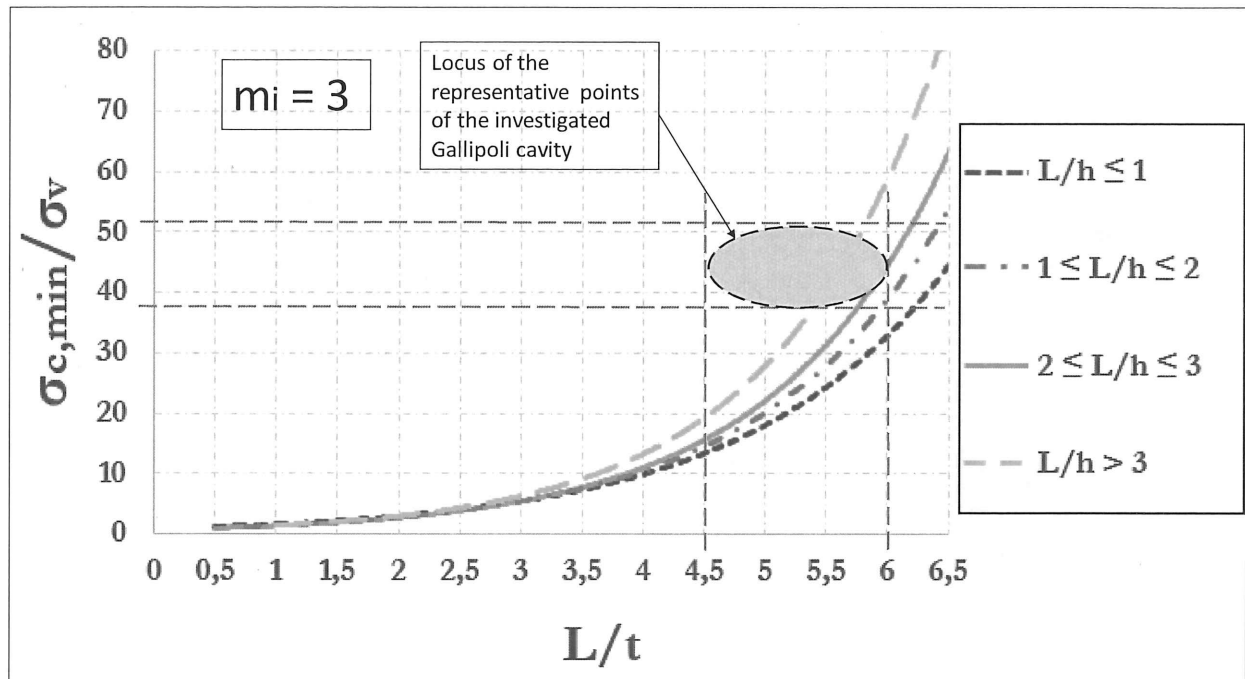

362  
363 Figure 16. Application of stability chart ( $m_i = 3$ ) for the Gallipoli underground quarry.  
364

365  
366  
367 Taking into account the stability charts corresponding to  $m_i = 3$  and, specifically, the threshold curve  
368 for  $L/h > 3$ , the representative area of the investigated cavity is very close to the threshold curve  
369 (Figure 16); therefore, it comes out that the cavity was in a state of incipient failure, so that some  
370 external factor, as for example vibrations or concentrated seepages, could have triggered the  
371 instability.

↳ pipes or sewer leakages?

372  
373  
374 **3.4. Cutrofiano underground caves**  
375

376 In the last century several underground quarries were excavated at the outskirts of the town of  
377 Cutrofiano (southern Apulia) with the room-and-pillar technique. Later on, these quarries were  
378 abandoned, and the urban area expanded above the areas originally interested by their  
379 development. Geological surveys have highlighted, in the southern part of the town, the existence  
380 of a diffuse net of underground cavities. The location of three quarries, respectively named as cave  
381 A, cave B and cave C, with respect to the overlying built-up environment, is reported in Figure 17.  
382  
383

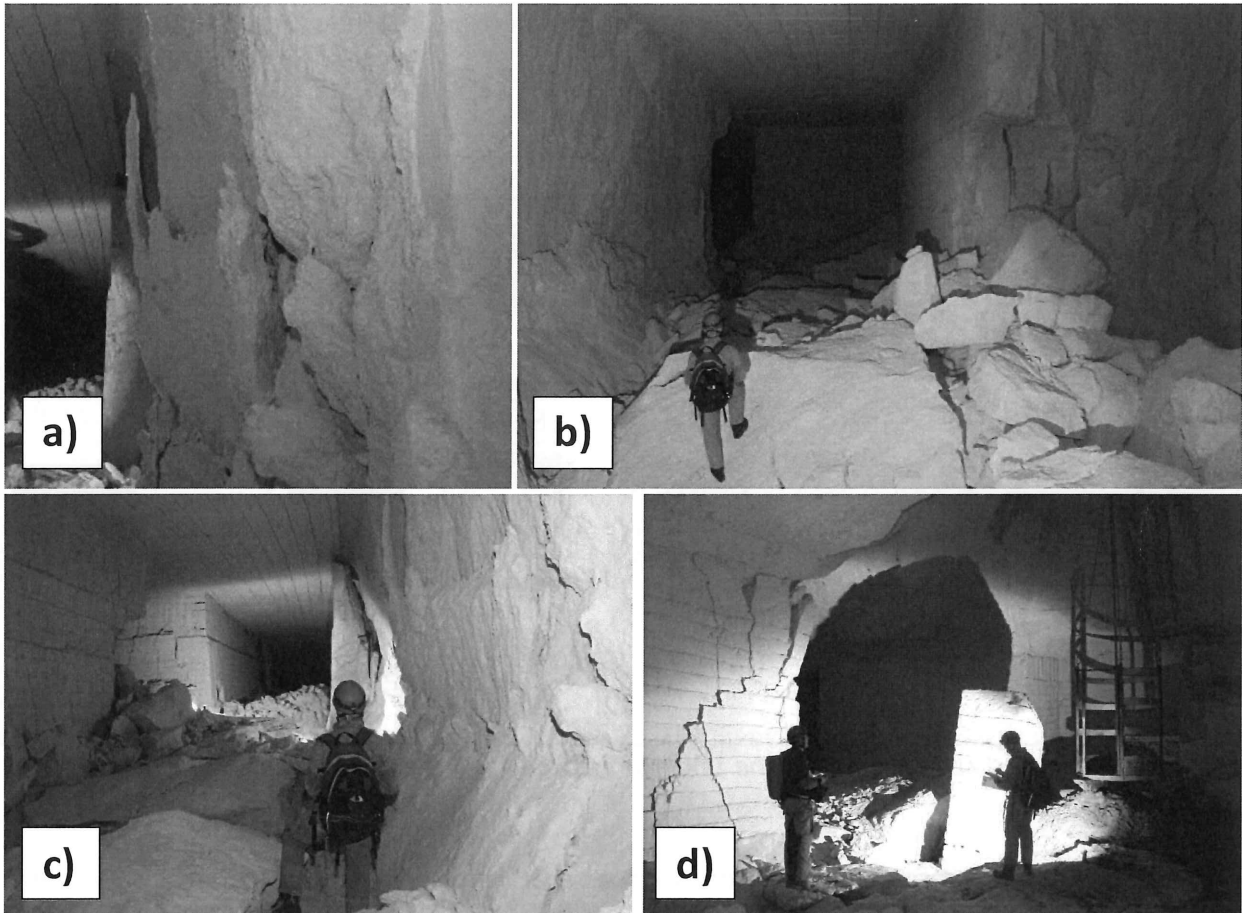

See  
p7

394  
395  
396  
397  
398  
399  
400

Figure 18. Signs of local instability in the Cutrofiano underground quarries: a) diffuse fracturing of a wall; b) detachments of material from walls; c) massive falls from the walls, with heavy production of debris heaps on the floor; d) open fractures at the pillars rim, in correspondence of the main shaft of access to the cavity. *Smile?*

401  
402  
403  
404  
405  
406  
407  
408  
409  
410  
411  
412  
413

For each of the examined cavities, a detailed geometrical and geological survey has been performed. The geological setup of the area is formed of shallow layers of clays, silts and/or sands that overlie a stiffer layer of calcarenite, locally named “Mazzaro”, which generally represent the roof of the quarries. Therefore, in order to apply the stability charts the “Mazzaro” level has been considered. From a geomechanical point of view, unit weight values in the range of  $18.6 \div 19.6 \text{ kN/m}^3$  for sandy layers and  $19.8 \div 20.5 \text{ kN/m}^3$  for the calcarenite layer has been respectively accounted for. A uniaxial compressive strength of about 2.4 MPa has been measured for the Mazzaro material forming the cave roofs (Lollino & Parise 2010), whereas the tensile strength is about 1/10 of the compressive one, so that the parameter  $m_i$  of the Hoek & Brown failure criterion is assumed to be equal to  $m_i = 8$ . In the following sub-sections, the representative conditions of each cavity are shown with respect to the corresponding chart.

3.4.1. Cave A

414  
415  
416  
417  
418

The stability analysis for cavity A has been carried out with reference to the cross-section AA in Figure 19. The width and height of cavity, are, respectively, equal to  $L = 7.50 \text{ m}$  and  $h = 5.0 \text{ m}$ , while the thickness of the resistant portion of the cave roof, which in this case is coincident with the

419 “Mazzaro” rocky layer, is  $t = 4.30$  m. Therefore, the non-dimensional ratios result to be about  $L/t \approx$   
 420 1.74 and  $L/h \approx 1.5$ .  
 421  
 422

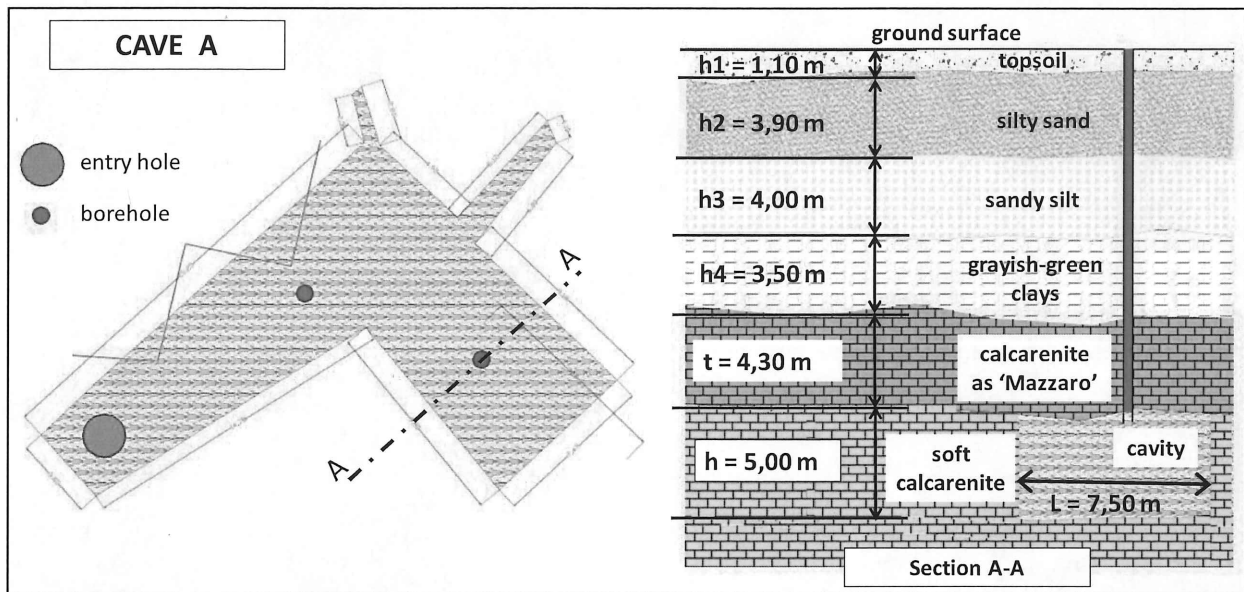

423  
 424 Figure 19. Plan and stratigraphy of the underground cavity A (adapted from Maglio and Ligori,  
 425 2014).  
 426

427 With reference to the stratigraphy in Figure 15, the vertical stress at the depth of the cavity roof is  
 428 equal to:

429  
 430 
$$\sigma_v \approx (\gamma_1 \cdot t_1) + (\gamma_2 \cdot t_2) + (\gamma_3 \cdot t_3) + (\gamma_4 \cdot t_4) + (\gamma_{\text{mazzaro}} \cdot t_{\text{mazzaro}}) = 324.62 \text{ kPa}$$
  
 431

432 so that, if  $\sigma_{c,\text{min}} = 2.4 \text{ MPa}$ , we obtain an operative value of  $\sigma_c/\sigma_v \approx 7.39$ .  
 433  
 434  
 435

### 436 3.4.2. Cave B

437  
 438 For cave B the calculation has been performed for section B-B in Figure 20. It has to be noted that  
 439 in this case a two story civil building exists just above the cavity, thus representing a further  
 440 overburden stress, which has been approximately evaluated equal to  $q = 100 \text{ kPa}$ .  
 441 The width and the height of the cavity are equal to  $L = 6.80 \text{ m}$  and  $h = 5.00 \text{ m}$ , respectively, while  
 442 the thickness of the resistant beam-shaped portion of the roof, i.e. the “Mazzaro” layer, is  $t = 2.70$   
 443 m. Therefore, the non-dimensional ratios result to be about  $L/t \approx 2.52$  and  $L/h \approx 1.36$ .  
 444  
 445

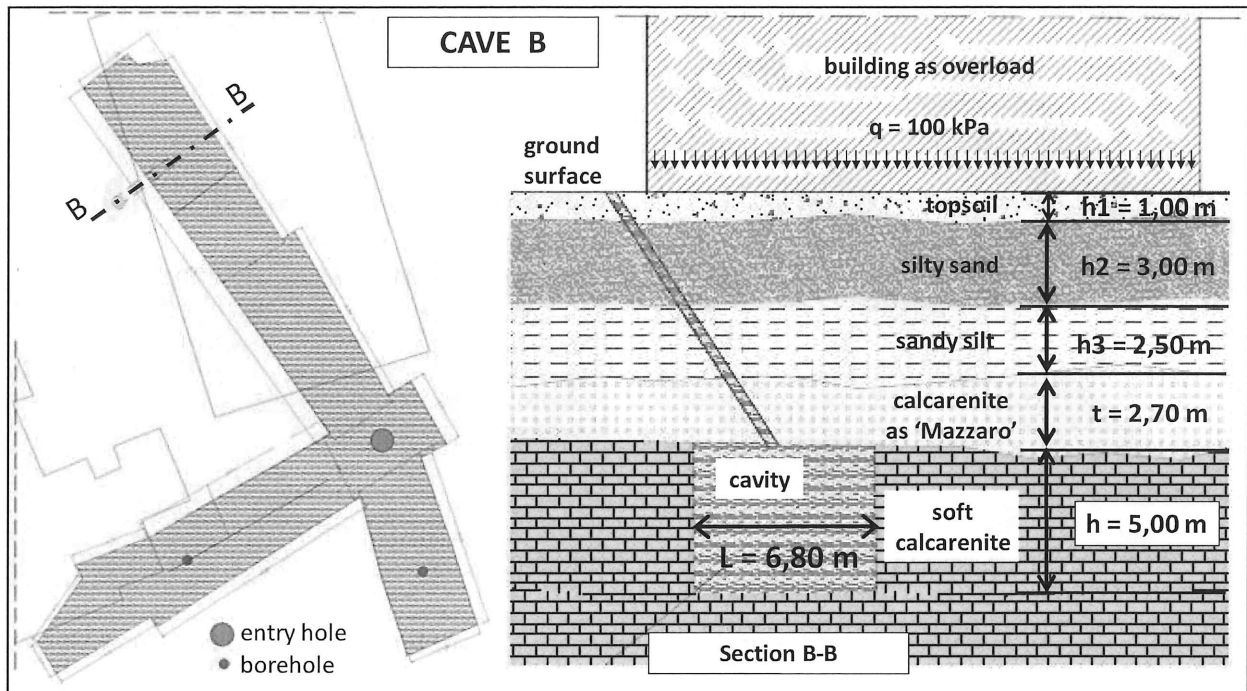

446  
447 *Figure 20. Plan and stratigraphy of the underground cavity B (adapted from Maglio and Ligori, 2014).*

448  
449  
450 With reference to the stratigraphy in Figure 16, the vertical stress at the depth of the cavity roof is  
451 equal to:

452  
453 
$$\sigma_v \approx (\gamma_1 \cdot t_1) + (\gamma_2 \cdot t_2) + (\gamma_3 \cdot t_3) + (\gamma_4 \cdot t_4) + (\gamma_{\text{mazzaro}} \cdot t_{\text{mazzaro}}) + q = 277.89 \text{ kPa}$$

454  
455 So that, if  $\sigma_c = 2.4 \text{ MPa}$ , the mobilized value of  $\sigma_c/\sigma_v$  is equal to 8.64.

456  
457  
458 **3.4.3. Cave C**

459  
460 For cave C the calculation has been performed for section C-C in Figure 21. The cave width and  
461 height are, respectively, equal to  $L = 5.50 \text{ m}$  and  $h = 7.00 \text{ m}$ , while the thickness of the resistant roof  
462 is  $t = 5.00 \text{ m}$  and the corresponding non-dimensional ratios result about  $L/t \approx 1.1$  and  $L/h \approx 0.79$ .



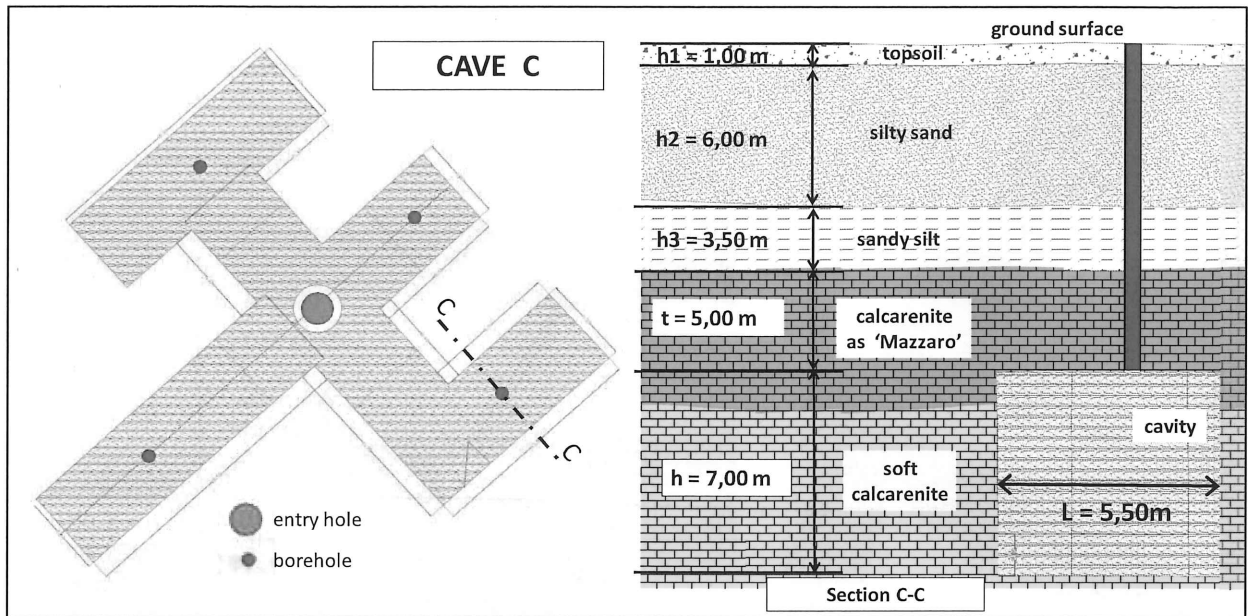

465  
466 Figure 21. Plan and stratigraphy of the underground cavity C (adapted from Maglio and Ligori, 2014).  
467  
468

469 In this case, the vertical stress at the depth of the cavity roof results to be:

470  
471 
$$\sigma_v \approx (\gamma_1 \cdot t_1) + (\gamma_2 \cdot t_2) + (\gamma_3 \cdot t_3) + (\gamma_4 \cdot t_4) + (\gamma_{\text{mazzaro}} \cdot t_{\text{mazzaro}}) = 299.7 \text{ kPa}$$
  
472

473 and assuming  $\sigma_c = 2.4 \text{ MPa}$ , we obtain  $\sigma_c / \sigma_v \approx 8$ .  
474  
475  
476

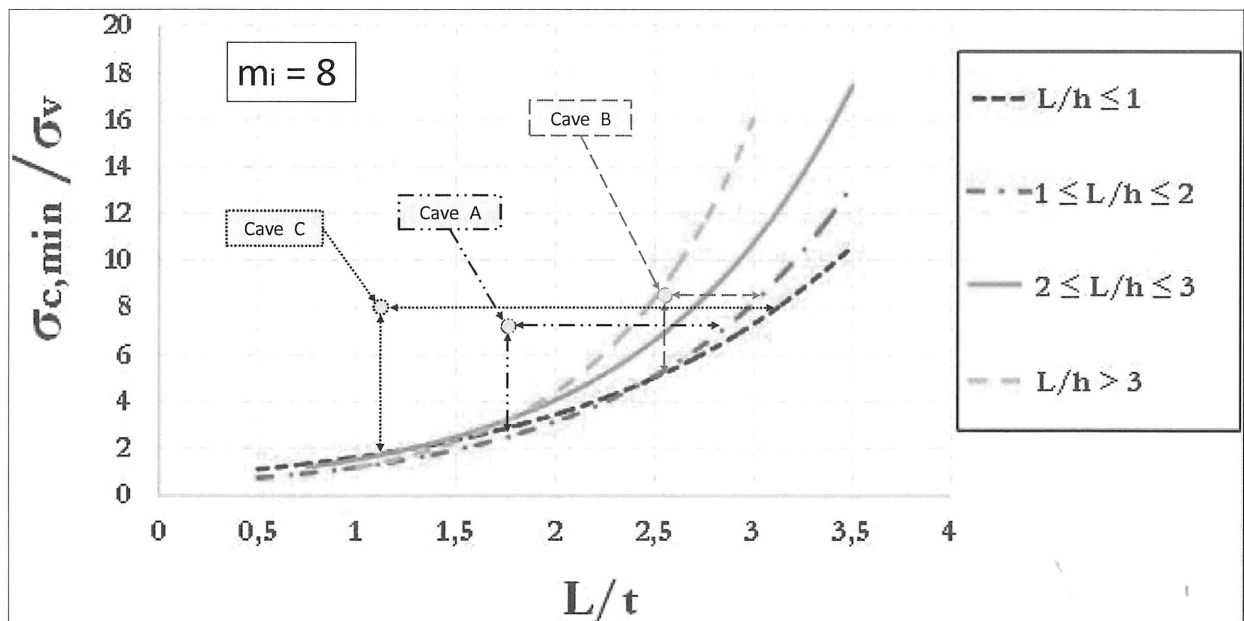

477  
478 Figure 22. Application of the stability chart ( $m_i = 8$ ) to the three underground quarries at Cutrofiano.  
479

480 It can be pointed out that all the three cavities are in the stable zone of the chart of Figure 22,  
481 although with different safety margins; in fact, the margin of safety for Cave B is low, even for the  
482 presence of the overlying building. Cave A and cave C seem to be the most stable, also in relation to  
483 the geometry of the caves as well as to the thickness of the "Mazzaro" resistant layer.

484  
485  
486  
487  
488  
489

#### 4. Discussion and concluding remarks

*What is the innovation of the paper related to this previous paper?*

490 In this paper, six case studies of underground artificial cavities, including three affected by sinkhole  
491 failures in the past and three in stable conditions at present, have been presented, aimed at  
492 application of the stability charts proposed by Perrotti et al. (2018). The proposed stability charts  
493 have been verified to represent a valid method to assess the stability of underground cavities in soft  
494 carbonate rocks. The study of sinkholes is generally very complex, due to both the problem of  
495 reconstructing the geometric scheme before failure, and to the difficulties in identifying the  
496 corresponding triggering factors. Moreover, these types of failure occur for abandoned cavities for  
497 which a detailed geometry is typically not available (the Marsala case, here presented, was an  
498 exception to this rule). Nevertheless, post-failure in situ surveys can help in this task and bring out,  
499 especially, what are the most likely causes leading to collapse.

500 For the Barletta and Marsala sinkhole case studies, the failure of the underground cave highlighted  
501 the vulnerability of the internal supporting elements, as singular pillars, on the entire system of  
502 quarry: as such, the loss of material strength with time, due to weathering effects, could lead to  
503 local instabilities, as detachments of rocks from the pillars, and, consequently, a reduction of the  
504 resistant cross-section that, in the long term, could result in a general pillar crushing. If the  
505 surrounding pillars are not able to sustain the stresses redistributed due to the previous instabilities,  
506 a progressive failure process of the internal pillars is likely to occur. This, in turn, leads to the increase  
507 of the distance between supporting elements, i.e. the cavity width, and therefore the possible  
508 general failure of the whole cave, with development of a proper sinkhole (generally, of the collapse  
509 or cover collapse types; see Gutierrez et al. 2014). Similarly, as well as the pillars, even the partition  
510 walls can also represent weakness elements of the system, especially when they are thin. Typically,  
511 soft and very soft rocks are exposed at a natural process of degradation (mainly due to the  
512 weathering effects with cyclical and seasonal fluctuations of water content) that may accelerate  
513 when overloads induced by underground works or vehicular traffic are applied. In an incipient state  
514 of collapse, such as that found in the stability chart of the Gallipoli underground quarry, low rates  
515 of vibrations could lead toward an acceleration of crack tensile opening with, consequently,  
516 propagation of fractures and formation of a sinkhole.

*→ the first crater?*

*the main assumptions are...?*

517 When underground quarries are suitably surveyed and mapped, a quantitative assessment of the  
518 stability conditions is possible; from this point of view, as shown for the three cases of underground  
519 quarries at Cutrofiano, stability charts allow preliminarily to evaluate the risk of an incipient  
520 collapse. For all the Cutrofiano case studies, stability charts have been applied for the section where  
521 the ratio  $L/t$  is the biggest within the cavity, in order to consider the most dangerous area in terms  
522 of safety: they resulted in stable conditions, even though with different safety margins.  
523 Furthermore, using stability charts is possible, within the same cavity, to distinguish the areas more

524 susceptible to instability phenomena. Based on these evaluations, the management of underground  
525 quarries may change according to the evolution of the corresponding stability conditions.

*How do you update the model?*

526 It is important to highlight once again that the use of stability charts is limited to the stage of  
527 preliminary analysis. This means that such charts, especially when built upon a very high number of  
528 cases, could be extremely useful to technicians and practitioners for a first evaluation of the stability  
529 conditions. However, in case a proneness to collapse is ascertained through the stability chart, it is  
530 absolutely necessary to move to the next stage, by carrying out site-specific tests and geotechnical  
531 laboratory tests on rock samples for the determination of the parameters needed for a full analysis  
532 of stability. The main limit of such an approach is therefore represented by an erroneous use of the  
533 charts, with the wrong belief that they could act as substitute to in situ and laboratory tests.  
534 Notwithstanding such drawback, the approach here presented can definitely be of help, especially  
535 when a high number of cavities need to be initially assessed, as concerns the stability standpoint.

536

537

## 538 **References**

539 Andriani, G.F., Walsh, N. Petrophysical and mechanical properties of soft and porous building rocks  
540 used in apulian monuments (South Italy). Geol. Soc., London, Spec. Publ., 333, 129–141, 2010.

541  
542 Cai, M. Practical estimates of tensile strength and Hoek–Brown strength parameter  $m_i$  of brittle  
543 rocks. Rock Mech. Rock Eng., 43(2), 167–184, 2010.

544  
545 Carter, T.G. Guidelines for use of the scaled span method for surface crown pillar stability  
546 assessment Ontario Ministry of Northern Development and Mines, 2010, pp. 1–34, 2014.

547  
548 Castellanza, R., Lollino, P., Ciantia, M.O. A methodological approach to assess the hazard of  
549 underground cavities subjected to environmental weathering. Tunnelling and Underground Space  
550 Technology 82:278-292. Elsevier. DOI: 10.1016/j.tust.2018.08.041, 2018.

551  
552 Ciantia, M.O., Castellanza, R., Di Prisco, C. Experimental study on the water-induced weakening of  
553 calcarenites. Rock Mech. Rock Eng., 48(2), 441–461, 2015.

554  
555 Coviello, A., Lagioia, R., Nova, R. On the measurement of the tensile strength of soft rocks. Rock  
556 Mech. Rock Eng., 38(4), 251–273, 2005.

557  
558 De Giovanni, A., Martimucci, V., Marzulli, M., Parise, M., Pentimone, N., Sportelli, D. Operazioni di  
559 rilievo e analisi preliminare dello sprofondamento in località San Procopio (Barletta)  
560 del 2-3 maggio 2010. Opera Ipogea, Journal of Speleology in Artificial Cavities, 1-2, pp. 151-158,  
561 2011.

562  
563 Delle Rose, M. La voragine di Gallipoli e le attività di protezione civile dell'IRPI-CNR. Geologi e  
564 Territorio. n° 4-2006 / 1-2007 pp. 3-12, 2007.

565

566 Evangelista, A., Pellegrino, A., Viggiani, C. Cavità e gallerie nel Tufo Giallo Napoletano. Atti IX Ciclo  
567 Conf. MIR, Le opera in sotterraneo e il rapporto con l'ambiente, Patron Editore. FALLA  
568 CASTELFRANCHI M. (1991) Pittura monumentale bizantina in Puglia. Milan, Italy, 2003.  
569

570 Fazio, N. L., Perrotti, M., Lollino, P., Parise, M., Vattano, M., Madonia, G., Di Maggio, C. A three-  
571 dimensional back-analysis of the collapse of an underground cavity in soft rocks. *Engineering*  
572 *Geology*, 228, 301-311, 2017.  
573

574 Federico, F., Screpanti, S. Effects of filling shallow room and pillar mines in weak pyroclastic rock.  
575 Proc., XIII European Conference on Soil Mechanics and Geotechnical Engineering, Geotechnical  
576 Problems with Man-made and Man Influenced. Grounds, Prague, The  
577 Czech Republic, 2003.  
578

579 Ferrero, A. M., Segalini, A., Giani, G. P. Stability analysis of historic underground quarries. *Comput.*  
580 *Geotech.*, 37(4), 476-486, 2010.  
581

582 Fiore, A., Fazio, N. L., Lollino, P., Luisi, M., Miccoli, M. N., Pagliarulo, R., Perrotti, M., Pisano, L.,  
583 Spalluto, L., Vennari, C., Vessia G., Parise, M. Evaluating the susceptibility to anthropogenic  
584 sinkholes in Apulian calcarenites, southern Italy. *Geological Society, London, Special*  
585 *Publications*, 466, 381-396, <https://doi.org/10.1144/SP466.20>, 2018.

586 Fiore, A., Parise, M. Cronologia degli eventi di sprofondamento in Puglia, con particolare  
587 riferimento alle interazioni con l'ambiente antropizzato. *Memorie Descrittive della Carta Geologica*  
588 *d'Italia*, 93, 239-252, 2013.  
589

590 Fraldi, M., Guarracino, F. Limit analysis of collapse mechanisms in cavities and tunnels according to  
591 the Hoek-Brown failure criterion. *Int. J. Rock Mech. Min. Sci.*, 46(4), 665-673, 2009.  
592

593 Gesualdo, A., Minutolo, V., and Nunziante, L. Failure in Mohr-Coulomb soil cavities. *Can. Geotech.*  
594 *J.*, 38(6), 1314-1320, 2001.  
595

596 Goodings, D. J., Abdulla, W. A. Stability charts for predicting sinkholes in weakly cemented sand  
597 over karst limestone. *Eng. Geol.*, 65(2-3), 179-184, 2002.  
598

599 Gutierrez, F., Parise, M., De Waele, L., Jourde, H. A review on natural and human-induced  
600 geohazards and impacts in karst. *Earth Science Reviews*, 138, 61-88, 2014.  
601

602 Hoek, E. Strength of rock and rock masses. *News J. ISRM*, 2(2), 4-16, 1994.  
603

604 Hoek E. Practical rock engineering.  
605 ([https://www.rocscience.com/documents/hoek/corner/Practical-Rock-Engineering-Full-Text](https://www.rocscience.com/documents/hoek/corner/Practical-Rock-Engineering-Full-Text.pdf)  
606 [.pdf](https://www.rocscience.com/documents/hoek/corner/Practical-Rock-Engineering-Full-Text.pdf)), 2007.  
607

608 Hoek, E., Brown, E. T. Practical estimates of rock mass strength. *Int. J. Rock Mech. Min. Sci.*, 34(8),  
609 1165-1186, 1997.  
610

611 Hoek, E., Martin, C. D. Fracture initiation and propagation in intact rock-A review. *J. Rock Mech.*  
612 *Geotech. Eng.*, 6(4), 287-300, 2014.

- 613  
614 Lollino, P., Parise, M. Analisi numerica di processi di instabilità di cavità sotterranee e degli effetti  
615 indotti in superficie. Proc. 2nd Int. Workshop "I sinkholes. Gli sprofondamenti catastrofici  
616 nell'ambiente naturale ed in quello antropizzato", Rome, 3-4 December 2009, 803.816, 2010.
- 617 Luisi, M., Di Santo, A., Fiore, A., Lepore, D., Lollino, P., Miccoli, M.N., Parise, M., Spalluto, L.  
618 Modellazione numerica 3D agli elementi finiti (FEM) per la valutazione delle condizioni di stabilità  
619 di cavità antropiche del territorio pugliese: il caso studio della cava ipogea di San Procopio  
620 (Barletta, Murge settentrionali). Mem. Descr. Carta Geol. d'It. XCIX, 327 – 336, 2015.  
621
- 622 Maglio, A., Ligori, F. Intervento di bonifica e messa in sicurezza di cavità antropiche presenti nell'area  
623 urbana e suburbana. Studio di prefattibilità ambientale Maggio 2014. Comune di Cutrofiano.  
624 Ministero dell'Ambiente della Tutela del Territorio e del Mare, 2014.  
625
- 626 Parise, M. The impacts of quarrying in the Apulian karst. In: CARRASCO, F., LA MOREAUX, J.W., DURAN  
627 VALSERO, J.J., ANDREO, B. (eds.), *Advances in research in karst media*. Springer, p. 441-447, 2010.  
628
- 629 Parise, M. A present risk from past activities: sinkhole occurrence above underground quarries.  
630 *Carbonates and Evaporites*, 27 (2), 109-118, 2012.  
631
- 632 Parise, M., Lollino, P. A preliminary analysis of failure mechanisms in karst and man-made  
633 underground caves in Southern Italy. *Geomorphology*, 134(1-2), 132-143, 2011.  
634
- 635 Parise, M., De Giovanni, A., Martimucci, V. Sinkholes caused by underground quarries: the case of  
636 the 2-3 May 2010, event at Barletta (Southern Italy). *Speleology and Speleology, Proceedings IV*  
637 *International Scientific Conference, November 2013, Naberezhnye Chelny (Russia)*, 158-162, 2013.
- 638 Perrotti, M., Lollino, P., Fazio, N.L., Pisano, L., Vessia, G., Parise, M., Fiore, A., Luisi, M. Finite element-  
639 based stability charts for underground cavities in soft calcarenites, *International Journal of*  
640 *Geomechanics*, 10.1061/(ASCE)GM.1943-5622.0001175, 2018.
- 641 Suchowerska, A. M., Merifield, R. S., Carter, J. P., Clausen, J. "Prediction of underground cavity roof  
642 collapse using the Hoek-Brown failure criterion." *Comput. Geotech.*, 44, 93-103, 2012.  
643
- 644 Vattano, M., Di Maggio, C., Madonna, G., Parise, M., Lollino, P., Bonamini, M. Examples of  
645 anthropogenic sinkholes in Sicily and comparison with similar phenomena in southern Italy. In:  
646 *Proc. 13th Multidisc. Conf., May 6-10, Carlsbad, New Mexico. NCKRI Symposium, vol. 2. pp. 263-*  
647 *271, 2013.*
